# Supplementary material
Source: PubMed Central journal article supplement (PMC6579113)
Supplement: NIHMS1506144-supplement-1.pdf [file NIHMS1506144-supplement-1.pdf]

Supplementary Table 1: Codon Adaptation Index (CAI) calculation of genes of most highly expressed cellular proteins, HIV-1 viral genes, and genes related to DNA damage response signaling.

| <b>Most Highly Expressed Cellular Proteins</b> |         |            |             | <b>HIV-1 Viral Genes (pNL4-3), M19921.2</b>        |         |            |             |
|------------------------------------------------|---------|------------|-------------|----------------------------------------------------|---------|------------|-------------|
| Gene Name                                      | Gene ID | CDS Length | CAI         | Gene Name                                          | Gene ID | CDS Length | CAI         |
| <b>GAPDH</b>                                   | 2597    | 1008       | <b>0.81</b> | Gag                                                |         | 1503       | 0.59        |
| RPL37A                                         | 6168    | 279        | 0.78        | Pol                                                |         | 3012       | 0.56        |
| CFL1                                           | 1072    | 501        | 0.85        | Vif                                                |         | 579        | 0.59        |
| PPIA                                           | 5478    | 498        | 0.78        | Vpr                                                |         | 291        | 0.61        |
| LGALS1                                         | 3956    | 408        | 0.87        | Vpu                                                |         | 246        | 0.45        |
| PKM                                            | 5315    | 1818       | 0.78        | Env                                                |         | 7695       | 0.61        |
| EEF1A1                                         | 1915    | 1389       | 0.75        | Tat                                                |         | 261        | 0.68        |
| ENO1                                           | 2023    | 1305       | 0.78        | Rev                                                |         | 351        | 0.68        |
| VIM                                            | 7431    | 1401       | 0.79        | <b>Average (CAI)</b>                               |         |            | <b>0.60</b> |
| ACTB                                           | 60      | 1128       | 0.88        | <b>StdDev (CAI)</b>                                |         |            | <b>0.07</b> |
| TPI1                                           | 7167    | 750        | 0.75        |                                                    |         |            |             |
| PRDX1                                          | 5052    | 600        | 0.73        |                                                    |         |            |             |
| ANXA2                                          | 302     | 1074       | 0.79        | <b>DNA Damage Response Signaling Related Genes</b> |         |            |             |
| PFN1                                           | 5216    | 423        | 0.71        | Gene Name                                          | Gene ID | CDS Length | CAI         |
| TAGLN2                                         | 8407    | 663        | 0.78        | <b>ATM</b>                                         | 472     | 9171       | <b>0.64</b> |
| TUBA1C                                         | 84790   | 1560       | 0.80        | <b>ATR</b>                                         | 545     | 7935       | <b>0.65</b> |
| HIST1H2BK                                      | 85236   | 381        | 0.82        | PRKDC                                              | 5591    | 12387      | 0.70        |
| DHRS2                                          | 10202   | 903        | 0.76        | BRCA1                                              | 672     | 5592       | 0.67        |
| MIF                                            | 4282    | 348        | 0.81        | BRCA2                                              | 675     | 10257      | 0.63        |
| HNRNPA1                                        | 3178    | 1119       | 0.73        | MDM2                                               | 4193    | 1494       | 0.65        |
| ALDOA                                          | 226     | 1095       | 0.81        | MDM4                                               | 4194    | 1473       | 0.69        |
| HSPA8                                          | 3312    | 1941       | 0.75        | CHEK1                                              | 1111    | 1431       | 0.69        |
| HSP90AB1                                       | 3326    | 2175       | 0.78        | CHEK2                                              | 11200   | 1632       | 0.70        |
| HSPB1                                          | 3315    | 618        | 0.77        | MRE11                                              | 4361    | 2127       | 0.66        |
| <b>Average (CAI)</b>                           |         |            | <b>0.79</b> | NBN                                                | 4683    | 2265       | 0.63        |
| <b>StdDev (CAI)</b>                            |         |            | <b>0.04</b> | RAD50                                              | 10111   | 3939       | 0.64        |
|                                                |         |            |             | <b>Average (CAI)</b>                               |         |            | <b>0.66</b> |
|                                                |         |            |             | <b>StdDev (CAI)</b>                                |         |            | <b>0.03</b> |

CAI calculation was done using the web application at <http://genomes.urv.es/CAIcal/>. The sequences of 80 human ribosome protein genes as the reference gene set were retrieved from Ribosome Protein Gene Database (RPG, <http://ribosome.med.miyazaki-u.ac.jp/>).

Supplementary Table 2: Codon Adaptation Index (CAI) calculation of genes affiliated with various DNA damage repair mechanisms including HDR, NHEJ, and MMR.

| <b>Homology Directed Repair (HDR)</b> |         |            |             | <b>Nonhomologous End-Joining (NHEJ)</b> |         |            |             |
|---------------------------------------|---------|------------|-------------|-----------------------------------------|---------|------------|-------------|
| Gene Name                             | Gene ID | CDS Length | CAI         | Gene Name                               | Gene ID | CDS Length | CAI         |
| ATM                                   | 472     | 9171       | 0.64        | APLF                                    | 200558  | 1536       | 0.66        |
| ATR                                   | 545     | 7935       | 0.65        | ATM                                     | 472     | 9171       | 0.64        |
| ATRX                                  | 546     | 7476       | 0.67        | ATR                                     | 545     | 7935       | 0.65        |
| BARD1                                 | 580     | 2334       | 0.67        | DCLRE1C                                 | 64421   | 2079       | 0.69        |
| BLM                                   | 641     | 4254       | 0.66        | LIG4                                    | 3981    | 2736       | 0.64        |
| BRCA1                                 | 672     | 5592       | 0.67        | NHEJ1                                   | 79840   | 900        | 0.70        |
| BRCA2                                 | 675     | 10257      | 0.63        | PAXX                                    | 286257  | 672        | 0.68        |
| BRIP1                                 | 83990   | 3750       | 0.64        | POLL                                    | 27343   | 1728       | 0.78        |
| EME1                                  | 146956  | 1752       | 0.72        | PRKDC                                   | 5591    | 12387      | 0.70        |
| FANCF                                 | 2188    | 1125       | 0.71        | WRN                                     | 7486    | 4299       | 0.67        |
| FANCM                                 | 57697   | 6147       | 0.64        | XRCC4                                   | 7518    | 1011       | 0.67        |
| GEN1                                  | 348654  | 2727       | 0.65        | XRCC5                                   | 7520    | 2199       | 0.69        |
| MRE11                                 | 4361    | 2127       | 0.66        | XRCC6                                   | 2547    | 1830       | 0.76        |
| MUS81                                 | 80198   | 1659       | 0.76        | <b>Average (CAI)</b>                    |         |            | <b>0.69</b> |
| NBN                                   | 4683    | 2265       | 0.63        | StdDev (CAI)                            |         |            | 0.04        |
| PALB2                                 | 79728   | 3561       | 0.65        |                                         |         |            |             |
| PARPBP                                | 55010   | 1971       | 0.65        | <b>Mismatch Mediated Repair (MMR)</b>   |         |            |             |
| POLQ                                  | 10721   | 7773       | 0.64        | Gene Name                               | Gene ID | CDS Length | CAI         |
| RAD50                                 | 10111   | 3939       | 0.64        | EXO1                                    | 9156    | 2541       | 0.65        |
| RAD51                                 | 5888    | 1023       | 0.69        | HMGB1                                   | 3146    | 648        | 0.75        |
| RAD52                                 | 5893    | 1257       | 0.73        | LIG1                                    | 3978    | 2760       | 0.79        |
| RBBP8                                 | 5932    | 2694       | 0.65        | MLH1                                    | 4292    | 2271       | 0.72        |
| RPA1                                  | 6117    | 1851       | 0.72        | MLH3                                    | 27030   | 4362       | 0.67        |
| SLX4                                  | 84464   | 5505       | 0.74        | MSH2                                    | 4436    | 2805       | 0.65        |
| WRN                                   | 7486    | 4299       | 0.67        | MSH3                                    | 4437    | 3414       | 0.64        |
| XRCC2                                 | 7516    | 843        | 0.63        | MSH6                                    | 2956    | 4083       | 0.68        |
| XRCC3                                 | 7517    | 1041       | 0.78        | PCNA                                    | 5111    | 786        | 0.67        |
| <b>Average (CAI)</b>                  |         |            | <b>0.67</b> | PMS1                                    | 5378    | 2799       | 0.62        |
| StdDev (CAI)                          |         |            | 0.04        | PMS2                                    | 5395    | 2589       | 0.69        |
|                                       |         |            |             | POLD1                                   | 5424    | 3402       | 0.80        |
|                                       |         |            |             | RFC1                                    | 5981    | 3444       | 0.67        |
|                                       |         |            |             | RPA1                                    | 6117    | 1851       | 0.72        |
|                                       |         |            |             | <b>Average (CAI)</b>                    |         |            | <b>0.69</b> |
|                                       |         |            |             | StdDev (CAI)                            |         |            | 0.05        |

Supplementary Table 3: Codon Adaptation Index (CAI) calculation of genes affiliated with various DNA damage repair mechanisms including NER and BER.

| <b>Nucleotide Excision Repair (NER)</b> |         |            |             | <b>Base Excision Repair (BER)</b> |         |            |             |
|-----------------------------------------|---------|------------|-------------|-----------------------------------|---------|------------|-------------|
| Gene Name                               | Gene ID | CDS Length | CAI         | Gene Name                         | Gene ID | CDS Length | CAI         |
| CETN2                                   | 1069    | 519        | 0.74        | APEX1                             | 328     | 957        | 0.71        |
| CUL4A                                   | 8451    | 2280       | 0.72        | APEX2                             | 27301   | 1557       | 0.77        |
| DDB1                                    | 1642    | 3423       | 0.77        | APTX                              | 54840   | 1071       | 0.73        |
| DDB2                                    | 1643    | 1284       | 0.76        | DNA2                              | 1763    | 3183       | 0.63        |
| ERCC1                                   | 2067    | 972        | 0.76        | FEN1                              | 2237    | 1143       | 0.82        |
| ERCC2                                   | 2068    | 2283       | 0.82        | LIG1                              | 3978    | 2760       | 0.79        |
| ERCC4                                   | 2072    | 2751       | 0.67        | LIG3                              | 3980    | 3030       | 0.76        |
| ERCC5                                   | 2073    | 3561       | 0.67        | MBD4                              | 8930    | 1743       | 0.67        |
| ERCC6                                   | 2074    | 4482       | 0.71        | MUTYH                             | 4595    | 1650       | 0.76        |
| ERCC8                                   | 1161    | 1191       | 0.65        | NEIL1                             | 79661   | 1431       | 0.77        |
| LIG1                                    | 3978    | 2760       | 0.79        | NEIL2                             | 252969  | 999        | 0.75        |
| LIG3                                    | 3980    | 3030       | 0.76        | NEIL3                             | 55247   | 1818       | 0.67        |
| POLD1                                   | 5424    | 3402       | 0.80        | NTHL1                             | 4913    | 939        | 0.77        |
| POLE                                    | 5426    | 6861       | 0.80        | NUDT1                             | 4521    | 540        | 0.82        |
| RAD23B                                  | 5887    | 1230       | 0.65        | OGG1                              | 4968    | 1038       | 0.76        |
| RPA1                                    | 6117    | 1851       | 0.72        | PARP1                             | 142     | 3045       | 0.75        |
| XPA                                     | 7507    | 822        | 0.62        | PARP2                             | 10038   | 1752       | 0.70        |
| XPC                                     | 7508    | 2823       | 0.75        | PNKP                              | 11284   | 1566       | 0.76        |
| XRCC1                                   | 7515    | 1902       | 0.76        | POLB                              | 5423    | 1113       | 0.67        |
| <b>Average (CAI)</b>                    |         |            | <b>0.73</b> | POLG                              | 5428    | 3720       | 0.78        |
| StdDev (CAI)                            |         |            | 0.06        | SMUG1                             | 23583   | 813        | 0.78        |
|                                         |         |            |             | TDG                               | 6996    | 1233       | 0.65        |
|                                         |         |            |             | TDP1                              | 55775   | 1827       | 0.72        |
|                                         |         |            |             | UNG                               | 7374    | 942        | 0.70        |
|                                         |         |            |             | XRCC1                             | 7515    | 1902       | 0.76        |
|                                         |         |            |             | <b>Average (CAI)</b>              |         |            | <b>0.74</b> |
|                                         |         |            |             | StdDev (CAI)                      |         |            | 0.05        |

Supplementary Table 4: Codon TTA (Leu) usage frequency of human genome, genes of most highly expressed cellular proteins, HIV-1 viral genes, and genes related to DNA damage response signaling.

| <b>Human Genome*</b>                           |         |            | <b>HIV-1 Viral Genes (pNL4-3), M19921.2</b> |         |            |
|------------------------------------------------|---------|------------|---------------------------------------------|---------|------------|
| %TTA (Leu)                                     |         |            | Gene Name                                   | Gene ID | %TTA (Leu) |
| <b>8%</b>                                      |         |            |                                             |         |            |
| <b>Most Highly Expressed Cellular Proteins</b> |         |            | Gag                                         |         | 37%        |
| Gene Name                                      | Gene ID | %TTA (Leu) | Pol                                         |         | 42%        |
| <b>GAPDH</b>                                   | 2597    | <b>5%</b>  | Vif                                         |         | 27%        |
| RPL37A                                         | 6168    | 0%         | Vpr                                         |         | 22%        |
| CFL1                                           | 1072    | 0%         | Vpu                                         |         | 50%        |
| PPIA                                           | 5478    | 0%         | Env                                         |         | 25%        |
| LGALS1                                         | 3956    | 0%         | Tat                                         |         | 33%        |
| PKM                                            | 5315    | 2%         | Rev                                         |         | 0%         |
| EEF1A1                                         | 1915    | 0%         | <b>Average</b>                              |         | <b>30%</b> |
| ENO1                                           | 2023    | 0%         | StdDev                                      |         | 15%        |
| VIM                                            | 7431    | 0%         | <b>DNA Damage Response Signaling</b>        |         |            |
| ACTB                                           | 60      | 0%         | <b>Related Genes</b>                        |         |            |
| TPI1                                           | 7167    | 0%         | Gene Name                                   | Gene ID | %TTA (Leu) |
| PRDX1                                          | 5052    | 8%         | <b>ATM</b>                                  | 472     | <b>23%</b> |
| ANXA2                                          | 302     | 3%         | <b>ATR</b>                                  | 545     | <b>21%</b> |
| PFN1                                           | 5216    | 0%         | PRKDC                                       | 5591    | 13%        |
| TAGLN2                                         | 8407    | 5%         | BRCA1                                       | 672     | 22%        |
| TUBA1C                                         | 84790   | 5%         | BRCA2                                       | 675     | 30%        |
| HIST1H2BK                                      | 85236   | 0%         | MDM2                                        | 4193    | 14%        |
| DHRS2                                          | 10202   | 0%         | MDM4                                        | 4194    | 24%        |
| MIF                                            | 4282    | 0%         | CHEK1                                       | 1111    | 12%        |
| HNRNPA1                                        | 3178    | 13%        | CHEK2                                       | 11200   | 16%        |
| ALDOA                                          | 226     | 0%         | MRE11                                       | 4361    | 24%        |
| HSPA8                                          | 3312    | 2%         | NBN                                         | 4683    | 21%        |
| HSP90AB1                                       | 3326    | 2%         | RAD50                                       | 10111   | 17%        |
| HSPB1                                          | 3315    | 6%         | <b>Average</b>                              |         | <b>20%</b> |
| <b>Average</b>                                 |         | <b>2%</b>  | StdDev                                      |         | 5%         |
| StdDev                                         |         | 3%         |                                             |         |            |

\* Based on Codon Usage Database ([www.kazusa.or.jp/codon](http://www.kazusa.or.jp/codon)) - Homo sapiens [gbpri]: 93487 CDS's (40662582 codons).

The codon usage analysis was done using the web application (Sequence Manipulation Suite) at [http://www.bioinformatics.org/sms2/codon\\_usage.html](http://www.bioinformatics.org/sms2/codon_usage.html).

Supplementary Table 5: Codon TTA (Leu) usage frequency of genes affiliated with various DNA damage repair mechanisms including HDR, NHEJ, and MMR.

| <b>Homology Directed Repair (HDR)</b> |         |            | <b>Nonhomologous End-Joining (NHEJ)</b> |         |            |
|---------------------------------------|---------|------------|-----------------------------------------|---------|------------|
| Gene Name                             | Gene ID | %TTA (Leu) | Gene Name                               | Gene ID | %TTA (Leu) |
| ATM                                   | 472     | 23%        | APLF                                    | 200558  | 23%        |
| ATR                                   | 545     | 21%        | ATM                                     | 472     | 23%        |
| ATRX                                  | 546     | 28%        | ATR                                     | 545     | 21%        |
| BARD1                                 | 580     | 14%        | DCLRE1C                                 | 64421   | 27%        |
| BLM                                   | 641     | 20%        | LIG4                                    | 3981    | 22%        |
| BRCA1                                 | 672     | 22%        | NHEJ1                                   | 79840   | 5%         |
| BRCA2                                 | 675     | 30%        | PAXX                                    | 286257  | 4%         |
| BRIP1                                 | 83990   | 22%        | POLL                                    | 27343   | 2%         |
| EME1                                  | 146956  | 10%        | PRKDC                                   | 5591    | 13%        |
| FANCF                                 | 2188    | 6%         | WRN                                     | 7486    | 24%        |
| FANCM                                 | 57697   | 30%        | XRCC4                                   | 7518    | 10%        |
| GEN1                                  | 348654  | 26%        | XRCC5                                   | 7520    | 18%        |
| MRE11                                 | 4361    | 24%        | XRCC6                                   | 2547    | 4%         |
| MUS81                                 | 80198   | 3%         | <b>Average</b>                          |         | <b>15%</b> |
| NBN                                   | 4683    | 21%        | StdDev                                  |         | 9%         |
| PALB2                                 | 79728   | 20%        |                                         |         |            |
| PARPBP                                | 55010   | 17%        | <b>Mismatch Mediated Repair (MMR)</b>   |         |            |
| POLQ                                  | 10721   | 21%        | Gene Name                               | Gene ID | %TTA (Leu) |
| RAD50                                 | 10111   | 17%        | EXO1                                    | 9156    | 15%        |
| RAD51                                 | 5888    | 3%         | HMGB1                                   | 3146    | 0%         |
| RAD52                                 | 5893    | 15%        | LIG1                                    | 3978    | 0%         |
| RBBP8                                 | 5932    | 22%        | MLH1                                    | 4292    | 12%        |
| RPA1                                  | 6117    | 9%         | MLH3                                    | 27030   | 23%        |
| SLX4                                  | 84464   | 3%         | MSH2                                    | 4436    | 20%        |
| WRN                                   | 7486    | 24%        | MSH3                                    | 4437    | 17%        |
| XRCC2                                 | 7516    | 18%        | MSH6                                    | 2956    | 14%        |
| XRCC3                                 | 7517    | 4%         | PCNA                                    | 5111    | 7%         |
| <b>Average</b>                        |         | <b>18%</b> | PMS1                                    | 5378    | 34%        |
| StdDev                                |         | 8%         | PMS2                                    | 5395    | 16%        |
|                                       |         |            | POLD1                                   | 5424    | 0%         |
|                                       |         |            | RFC1                                    | 5981    | 15%        |
|                                       |         |            | RPA1                                    | 6117    | 9%         |
|                                       |         |            | <b>Average</b>                          |         | <b>13%</b> |
|                                       |         |            | StdDev                                  |         | 10%        |

Supplementary Table 6: Codon TTA (Leu) usage frequency of genes affiliated with various DNA damage repair mechanisms including NER and BER.

| <b>Nucleotide Excision Repair (NER)</b> |         |            | <b>Base Excision Repair (BER)</b> |         |            |
|-----------------------------------------|---------|------------|-----------------------------------|---------|------------|
| Gene Name                               | Gene ID | %TTA (Leu) | Gene Name                         | Gene ID | %TTA (Leu) |
| CETN2                                   | 1069    | 8%         | APEX1                             | 328     | 8%         |
| CUL4A                                   | 8451    | 15%        | APEX2                             | 27301   | 2%         |
| DDB1                                    | 1642    | 6%         | APTX                              | 54840   | 3%         |
| DDB2                                    | 1643    | 5%         | DNA2                              | 1763    | 16%        |
| ERCC1                                   | 2067    | 5%         | FEN1                              | 2237    | 0%         |
| ERCC2                                   | 2068    | 0%         | LIG1                              | 3978    | 0%         |
| ERCC4                                   | 2072    | 14%        | LIG3                              | 3980    | 2%         |
| ERCC5                                   | 2073    | 14%        | MBD4                              | 8930    | 10%        |
| ERCC6                                   | 2074    | 7%         | MUTYH                             | 4595    | 2%         |
| ERCC8                                   | 1161    | 23%        | NEIL1                             | 79661   | 0%         |
| LIG1                                    | 3978    | 0%         | NEIL2                             | 252969  | 9%         |
| LIG3                                    | 3980    | 2%         | NEIL3                             | 55247   | 14%        |
| POLD1                                   | 5424    | 0%         | NTHL1                             | 4913    | 0%         |
| POLE                                    | 5426    | 2%         | NUDT1                             | 4521    | 0%         |
| RAD23B                                  | 5887    | 30%        | OGG1                              | 4968    | 0%         |
| RPA1                                    | 6117    | 9%         | PARP1                             | 142     | 7%         |
| XPA                                     | 7507    | 27%        | PARP2                             | 10038   | 13%        |
| XPC                                     | 7508    | 3%         | PNKP                              | 11284   | 0%         |
| XRCC1                                   | 7515    | 2%         | POLB                              | 5423    | 24%        |
| <b>Average</b>                          |         | <b>9%</b>  | POLG                              | 5428    | 4%         |
| StdDev                                  |         | 9%         | SMUG1                             | 23583   | 0%         |
|                                         |         |            | TDG                               | 6996    | 12%        |
|                                         |         |            | TDP1                              | 55775   | 11%        |
|                                         |         |            | UNG                               | 7374    | 4%         |
|                                         |         |            | XRCC1                             | 7515    | 2%         |
|                                         |         |            | <b>Average</b>                    |         | <b>6%</b>  |
|                                         |         |            | StdDev                            |         | 6%         |
