# Supplementary material
Source: PubMed Central journal article supplement (PMC6579113)
Supplement: NIHMS1506144-supplement-Supplementary_Data_Set_1.pdf [file NIHMS1506144-supplement-Supplementary_Data_Set_1.pdf]

Figure 1b : FG cells

Anti-SLFN11 IB

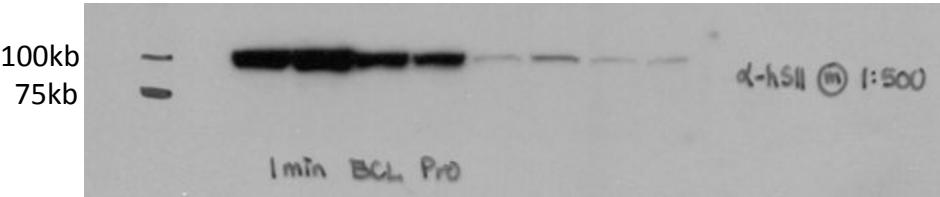

Anti-ATR IB

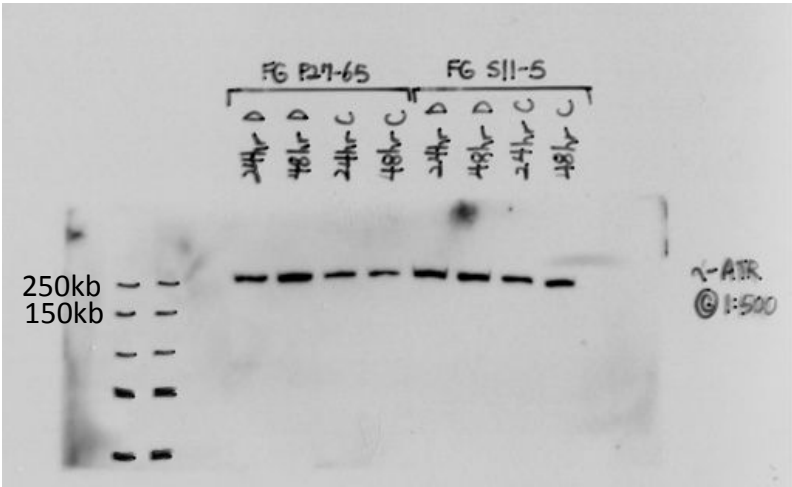

Anti-ATM IB

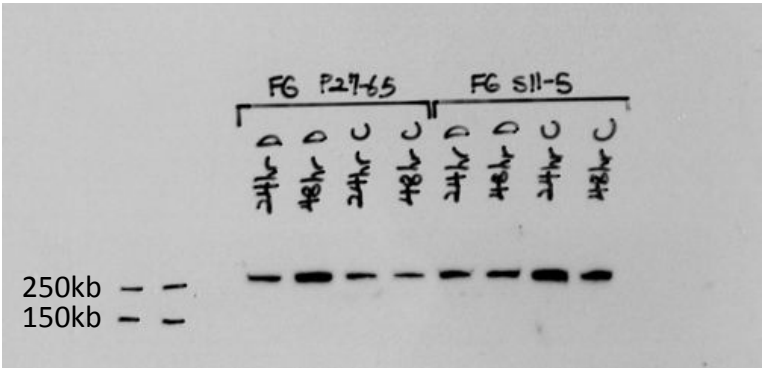

Anti-GAPDH IB

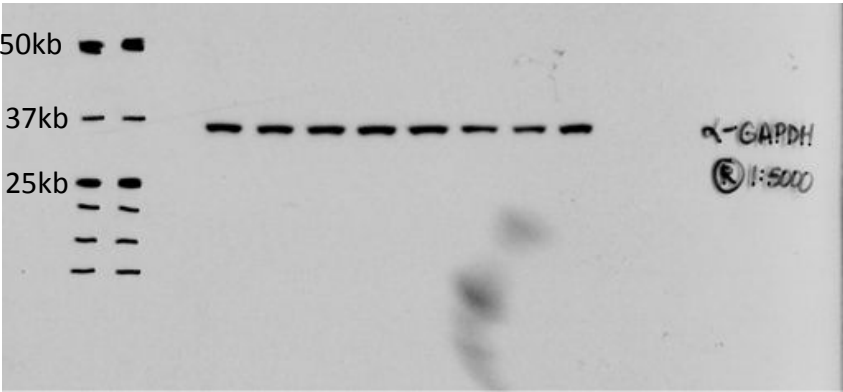

Figure 1e: HEK293

Anti-ATR IB

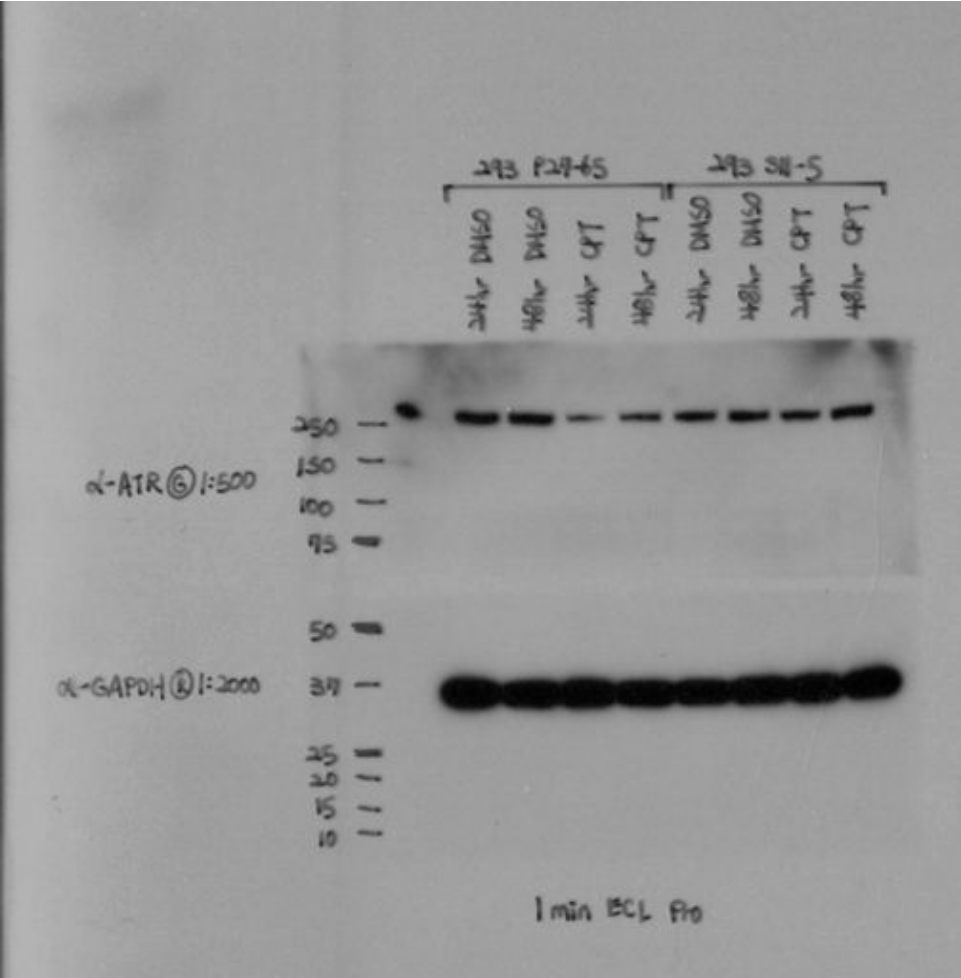

Anti-SLFN11 IB

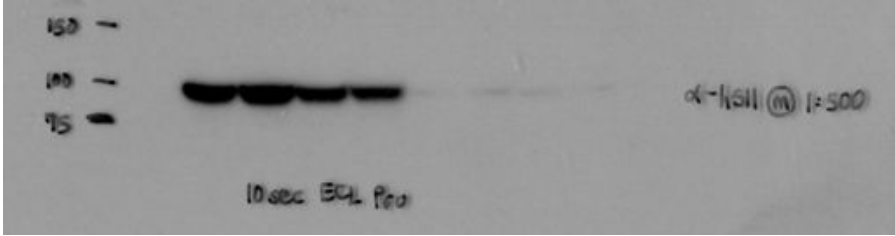

Anti-GAPDH IB

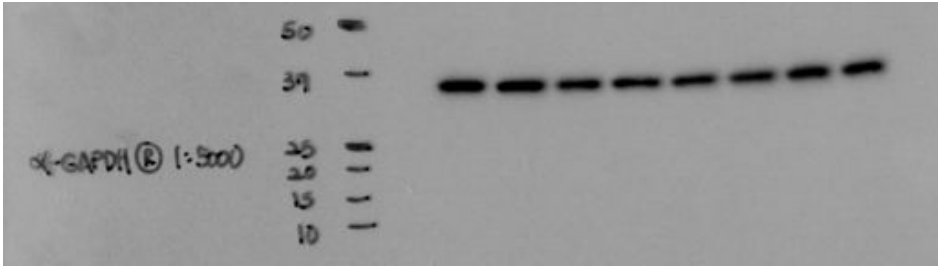

Figure 2a: FG (Ctrl and SLFN11KD) - ATM and ATR siRNA

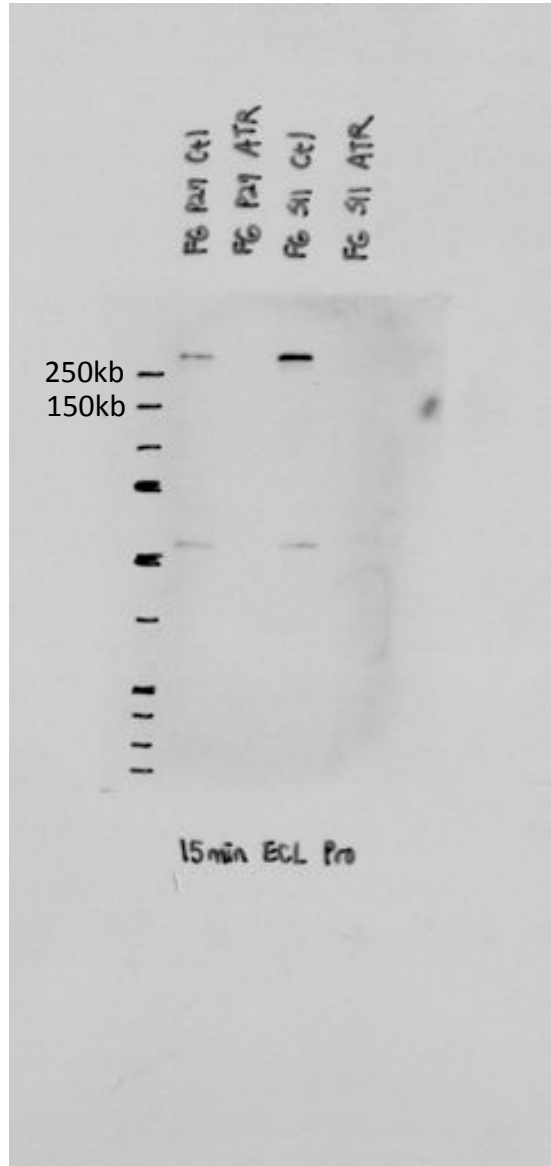

Anti-ATM IB

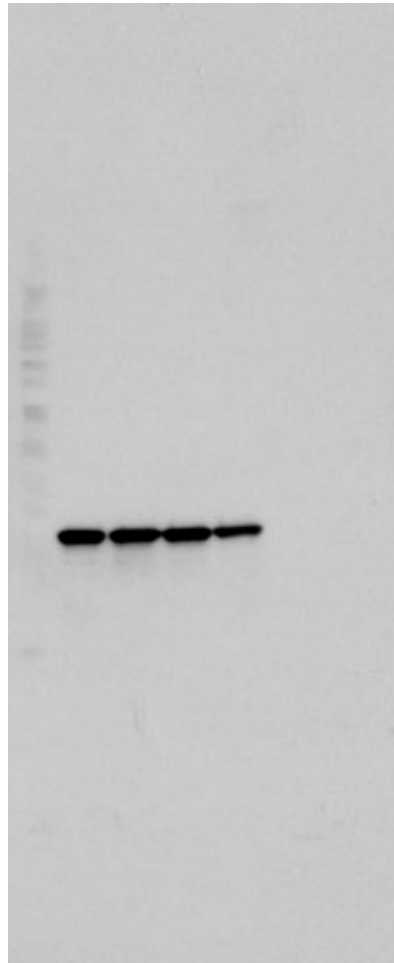

Anti-GAPDH IB

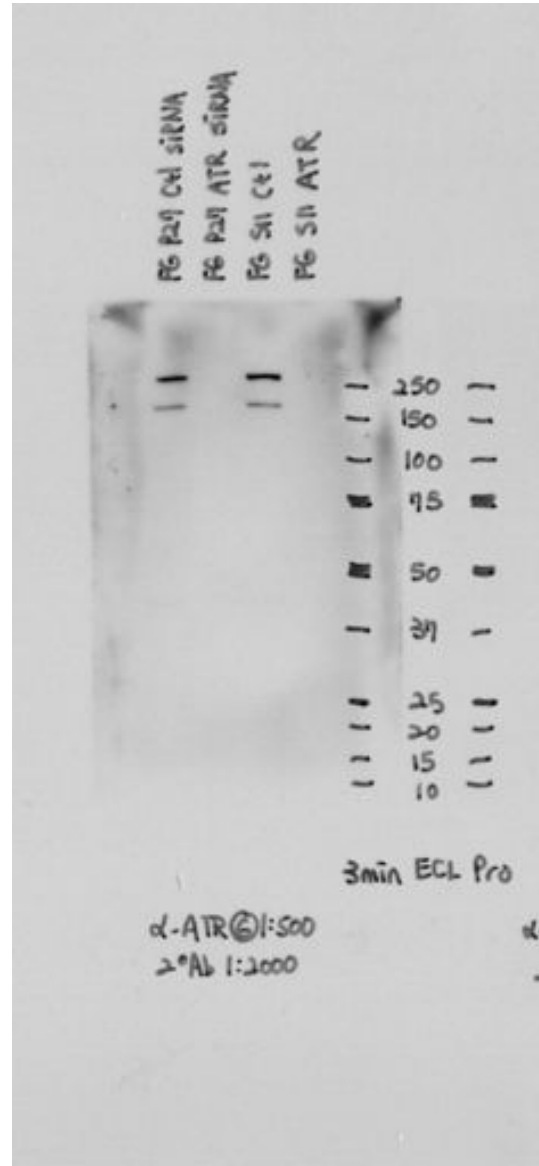

Anti-ATR IB

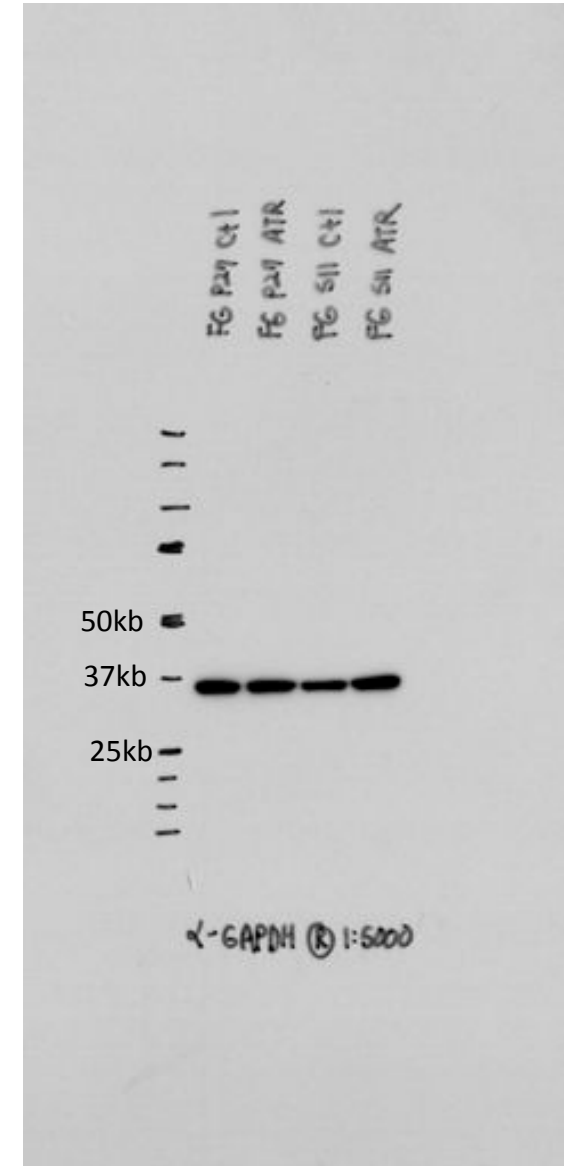

Anti-GAPDH IB

Figure 2c: HEK293 cells (Ctrl and SLFN11KD) - ATM and ATR siRNA

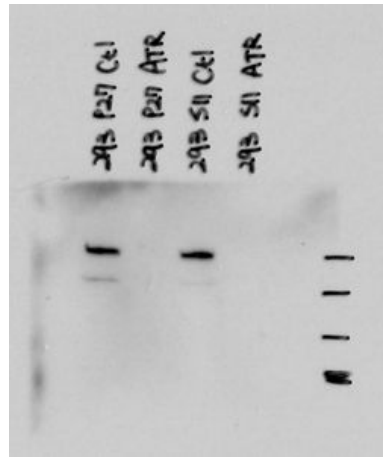

Anti-ATR IB

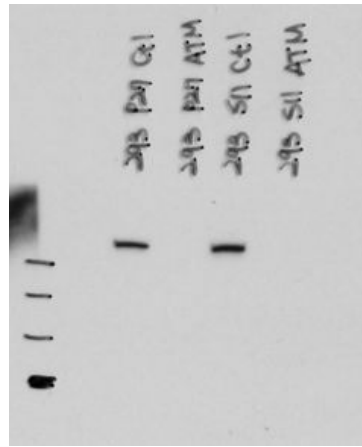

Anti-ATM IB

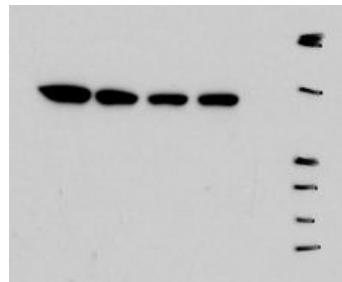

Anti-GAPDH IB

50kb  
37kb  
25kb

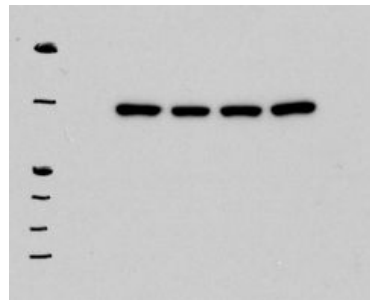

Anti-GAPDH IB

Figure 2e: MIA Paca-2 cells - ATR siRNA

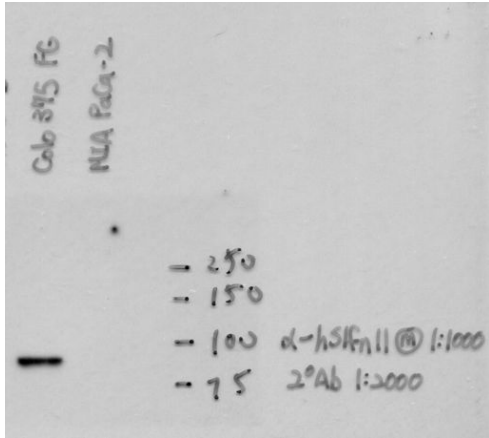

Anti-SLFN11 IB

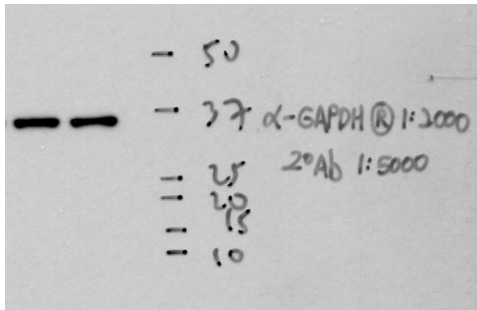

Anti-GAPDH IB

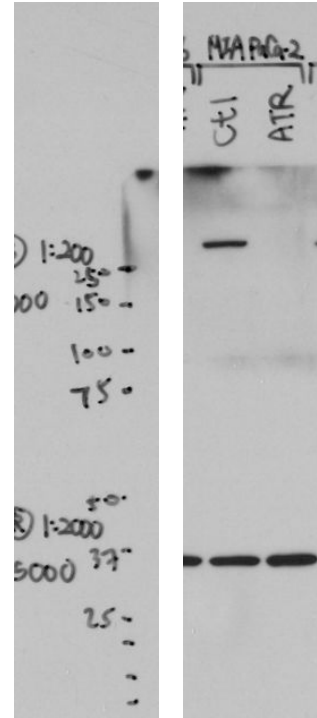

Anti-ATR IB

Anti-GAPDH IB

Figure 2-i

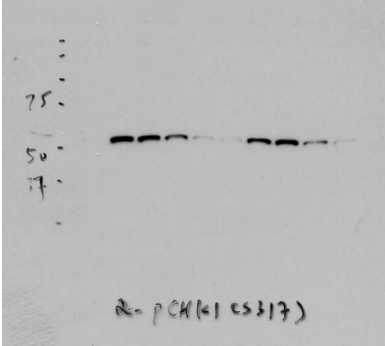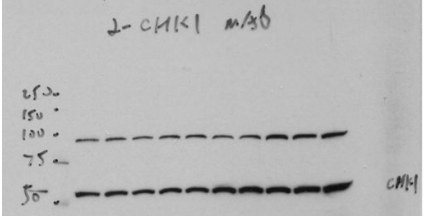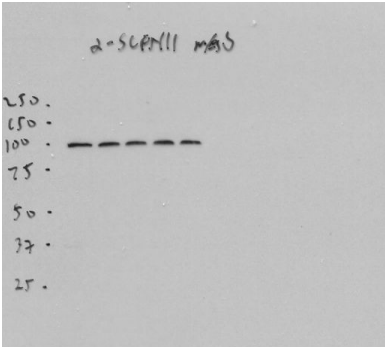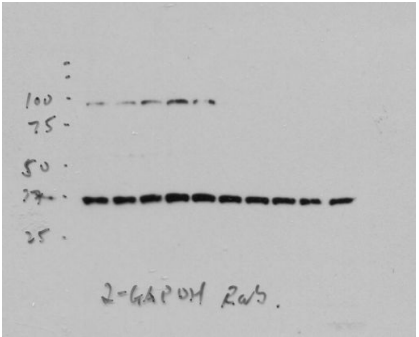

Figure 2-k

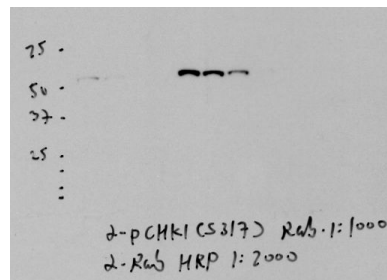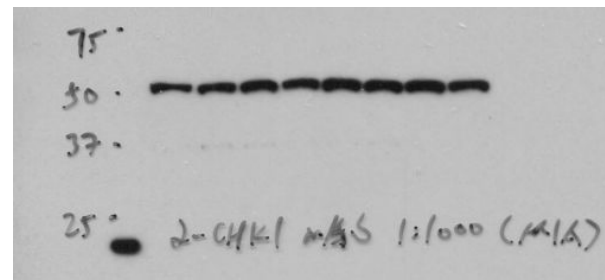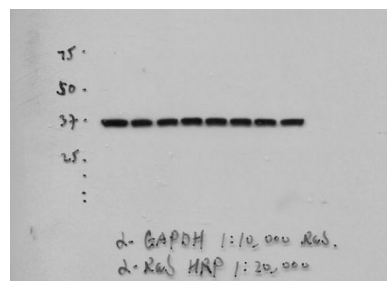

Figure 3a: 293 and FG S35 labeling and pulse-chase experiment: ATR IP

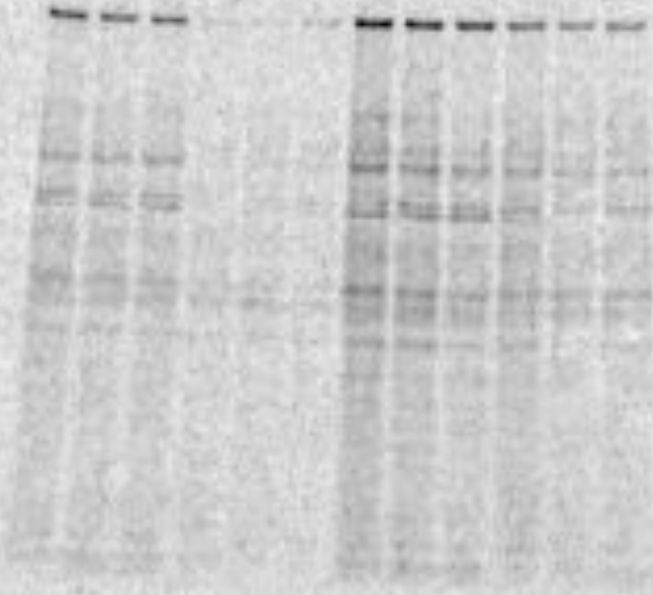

293

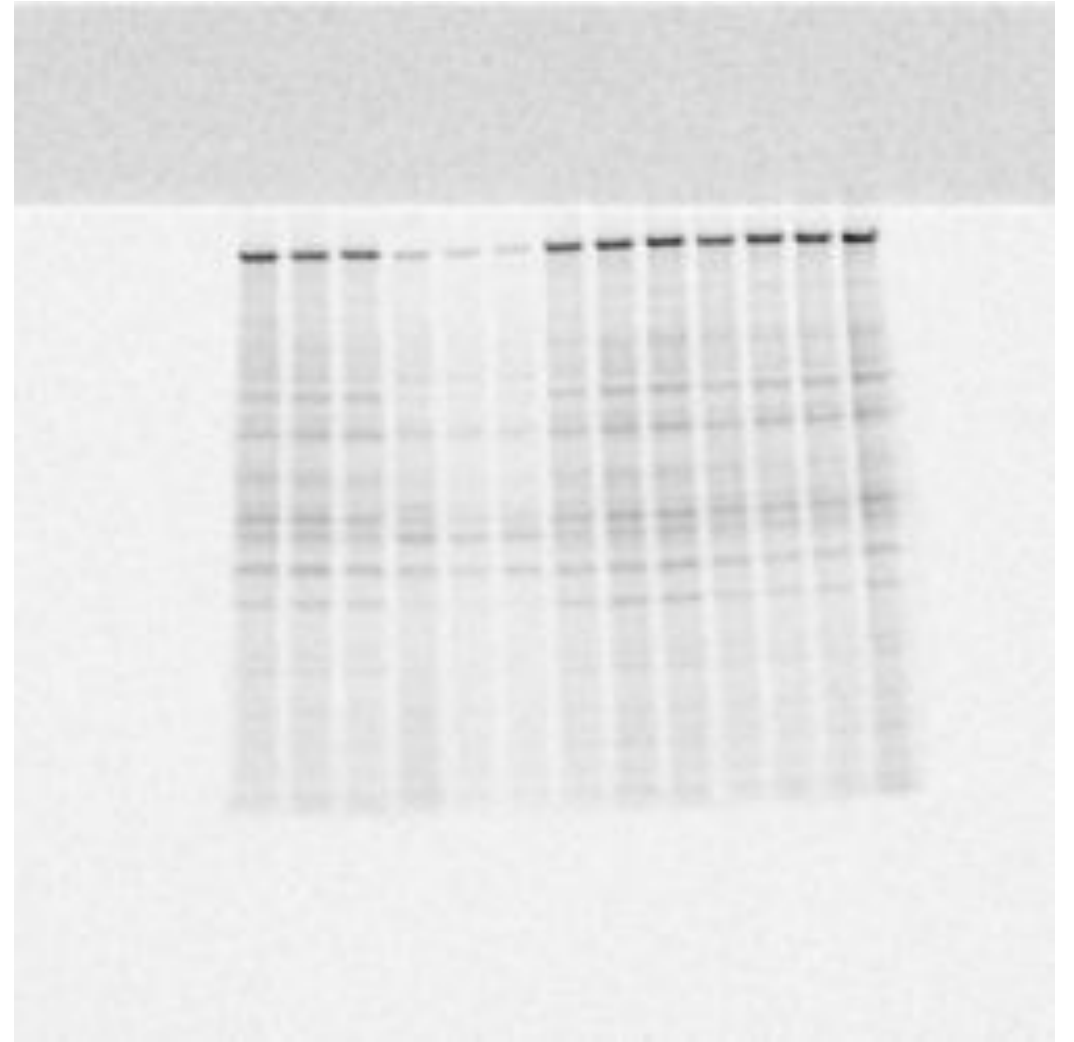

FG



Figure 3b: FG ATR and GAPDH IP CPT Kinetics

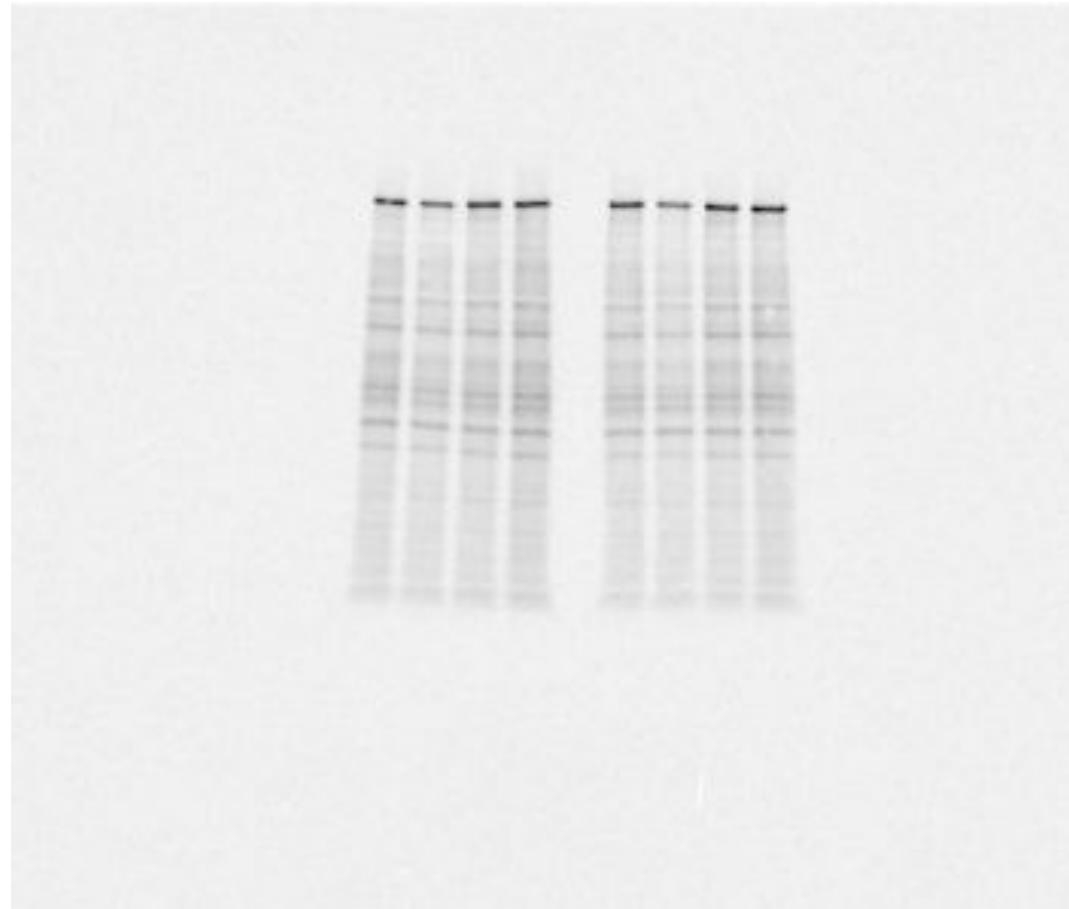

3hr CPT

6hr CPT

ATR IP

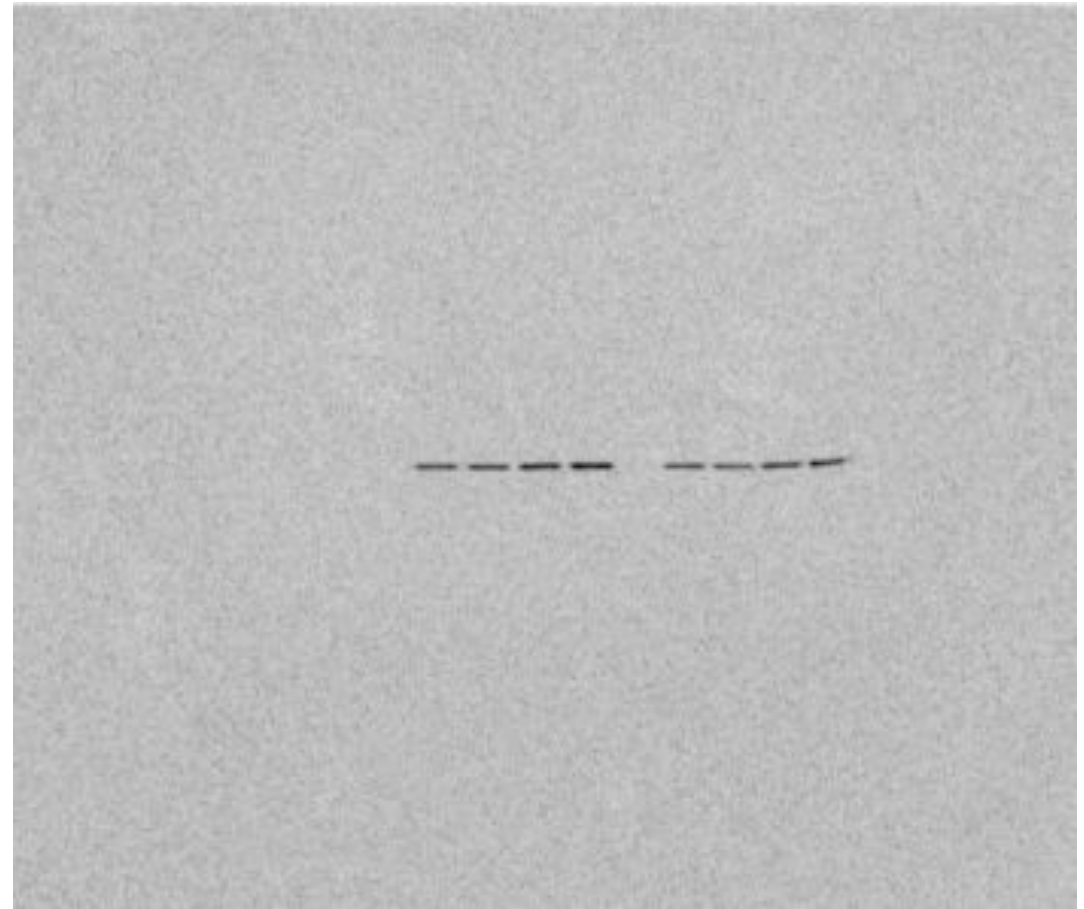

3hr CPT

6hr CPT

GAPDH IP

Figure 4-b

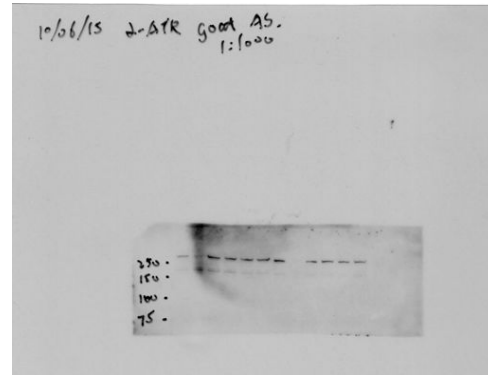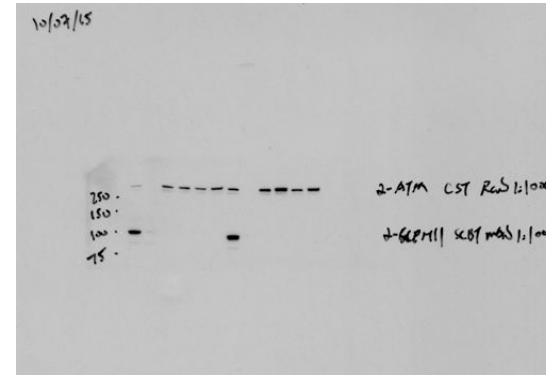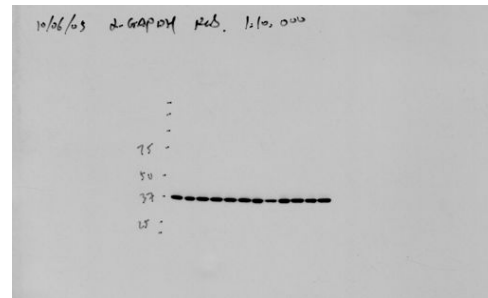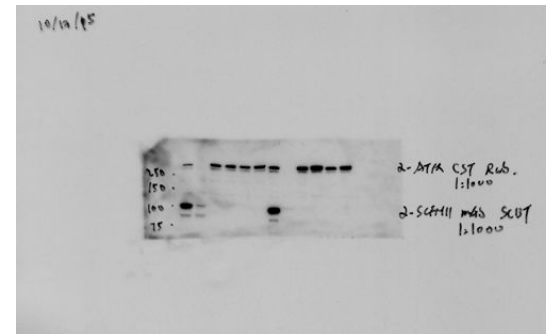

Figure 4-d

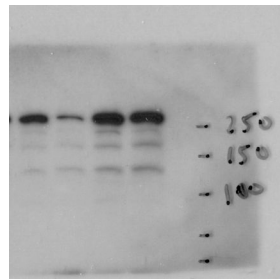

anti-ATR IB

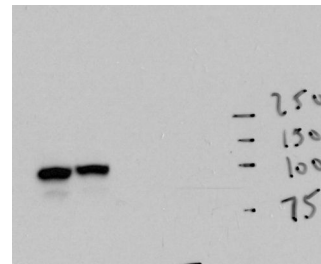

anti-SLFN11 IB

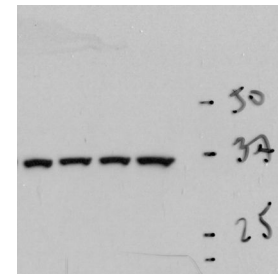

anti-GAPDH IB

Figure 6c

Labeling:

3Hr

FG/DMSO  
FG/CPT  
FG/SLFN11KO/DMSO  
FG/SLFN11KO/CPT

6Hr

FG/DMSO  
FG/CPT  
FG/SLFN11KO/DMSO  
FG/SLFN11KO/CPT

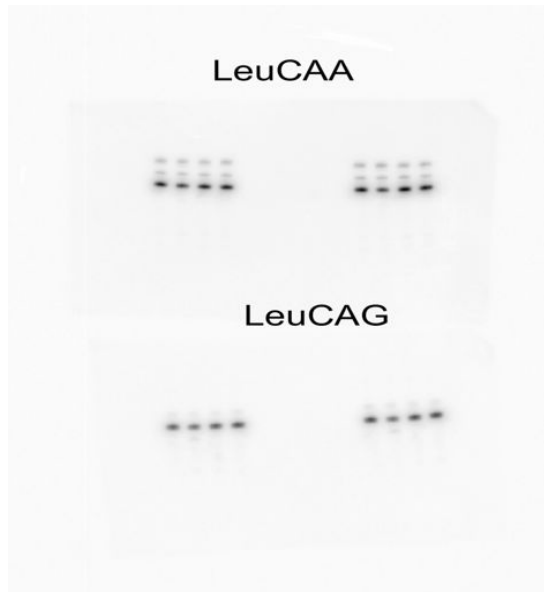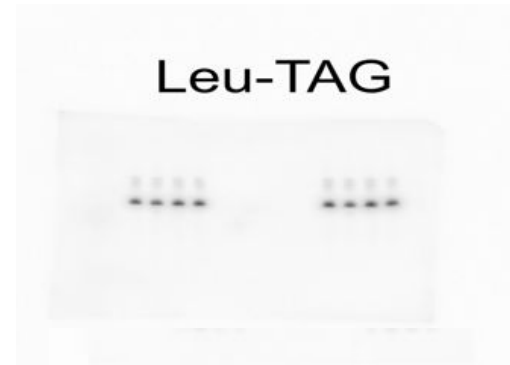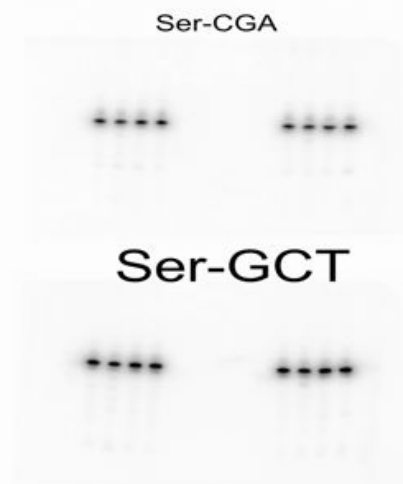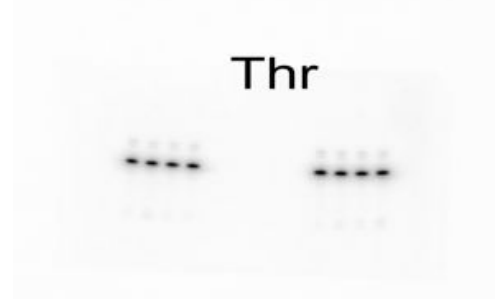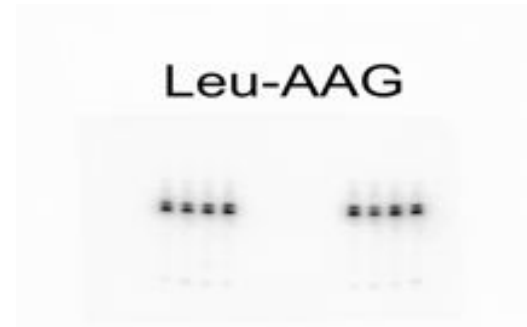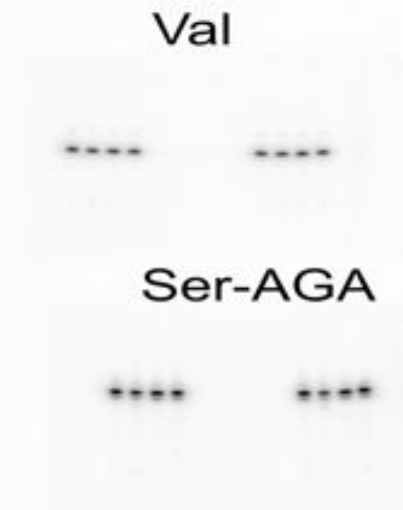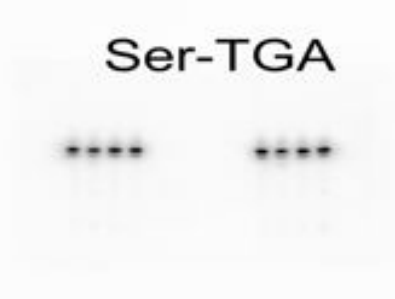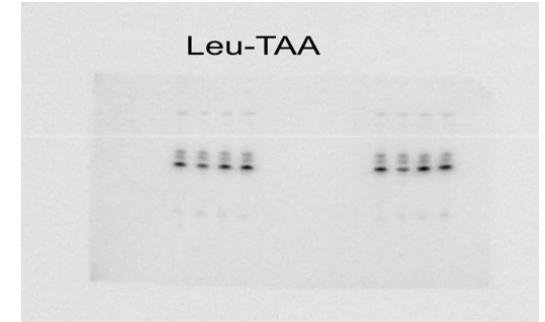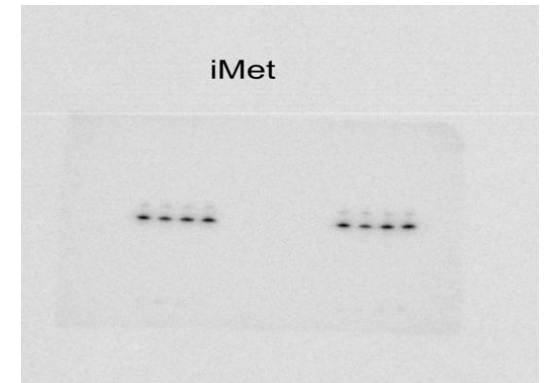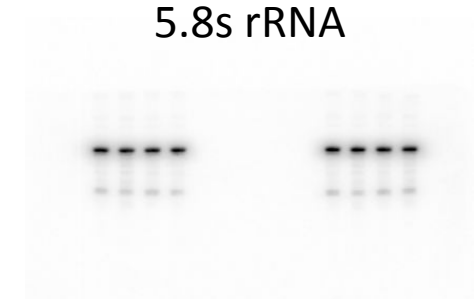

Figure 6c

Labeling:

12Hr

FG/DMSO

FG/CPT

FG/SLFN11KO/DMSO

FG/SLFN11KO/CPT

Leu-CAA

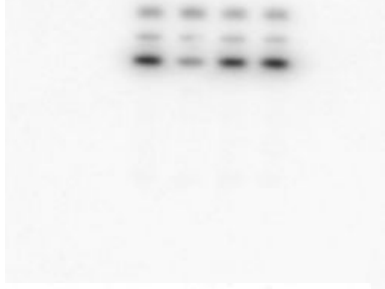

Leu-TAG

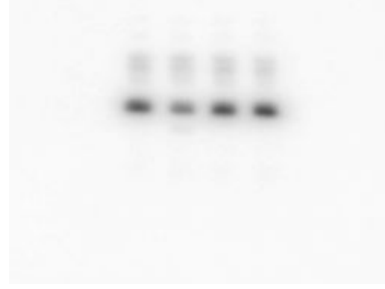

Leu-CAG

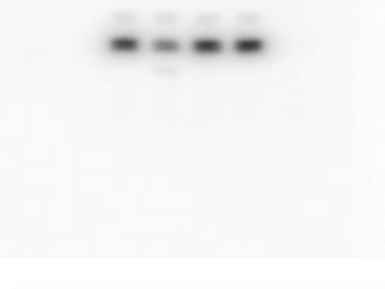

LeuAAG

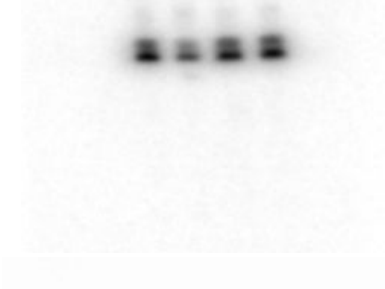

LeuTAA

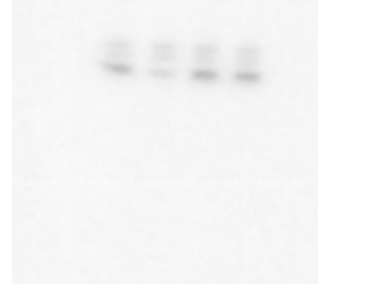

SerTGA

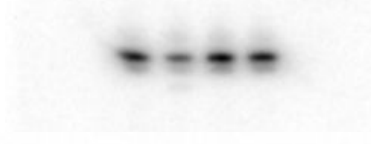

Ser-CGA

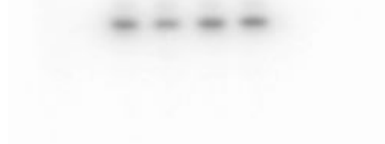

Ser-AGA

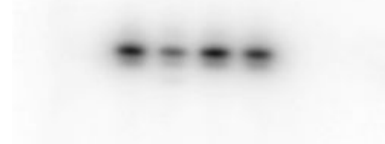

Ser-GCT  
(from 1st blots)

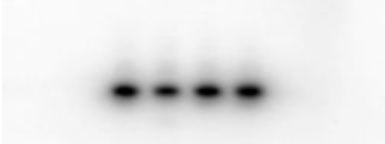

iMet

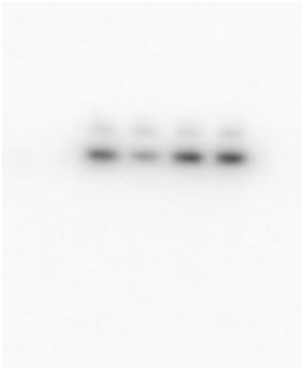

Threonine

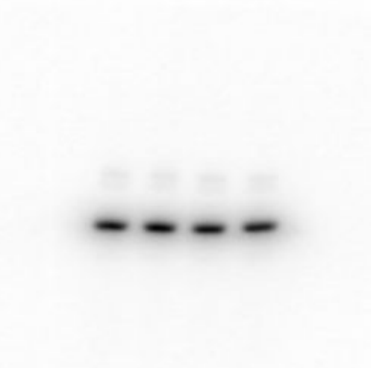

Valine

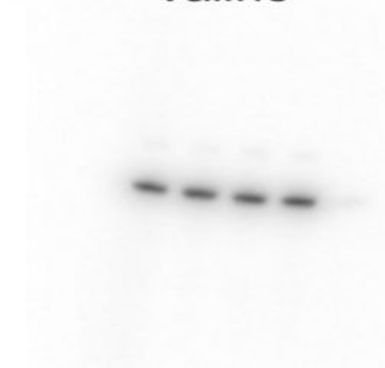

5.8s rRNA

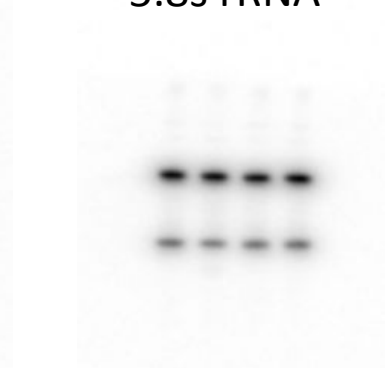

Figure 6d

Labeling:

---

293T/CTRL  
293T/SLFN11

Leu-AAG Leu-TAA Leu-TAG Leu-CAA Leu-CAG Ini-CAT

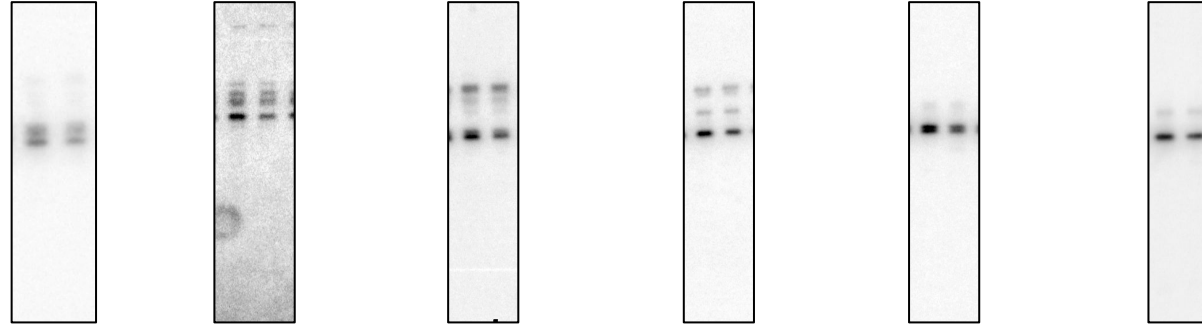

Ser-GCT Ser-TGA Ser-AGA Ser-CGA VAL-TAC Thr-TGT 5.8s rRNA

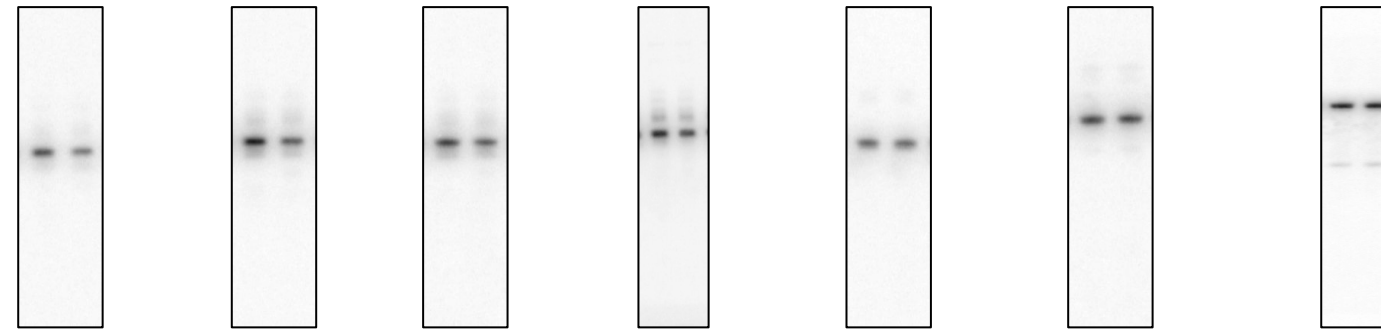

Figure 6e

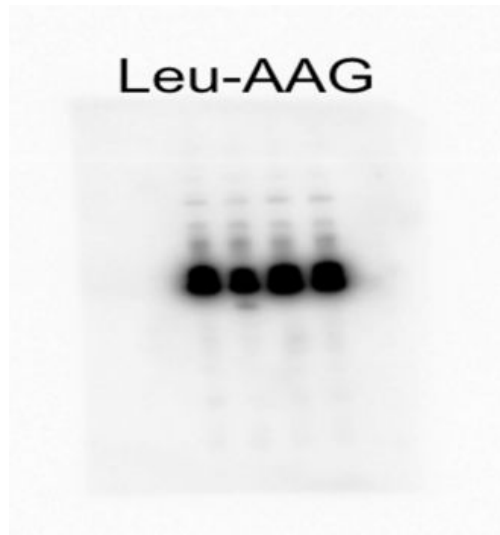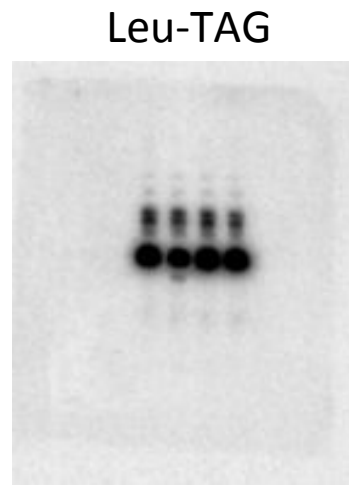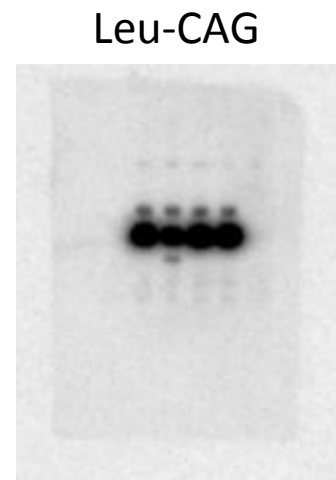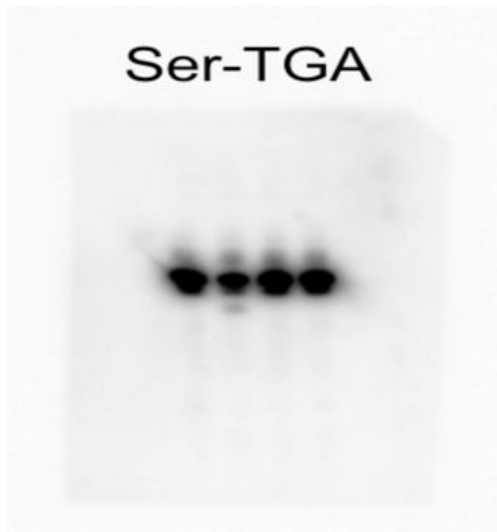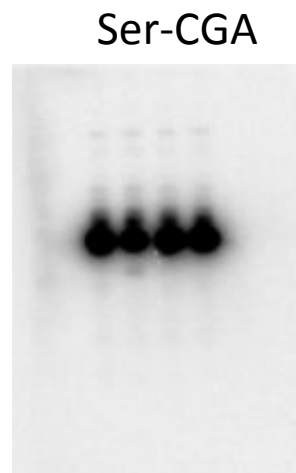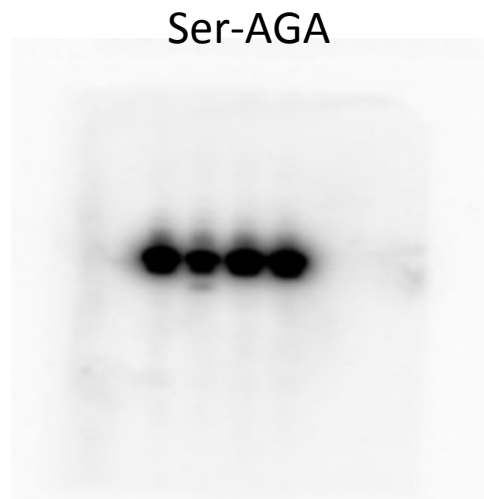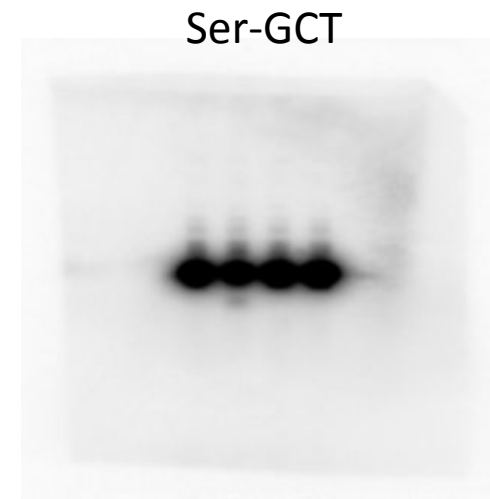





Figure 7-a

Leu-TAA NB

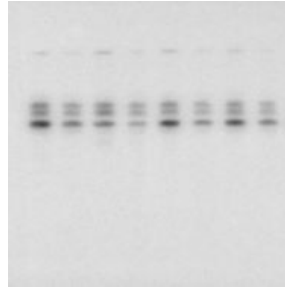

Ser-CGA NB

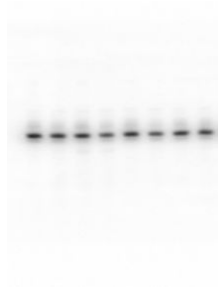

5.8s rRNA NB

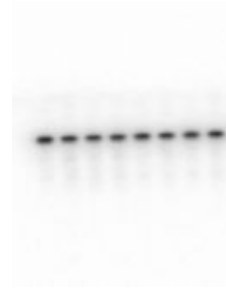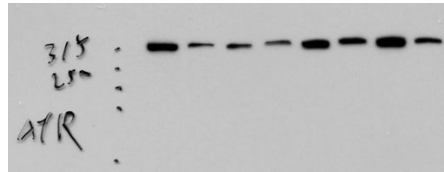

anti-ATR IB

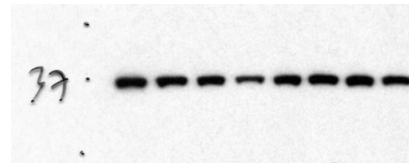

anti-GAPDH IB

Figure 8-a

Leu-TAA NB

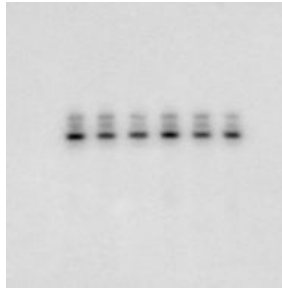

Ser-CGA NB

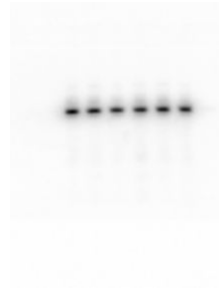

5.8s rRNA NB

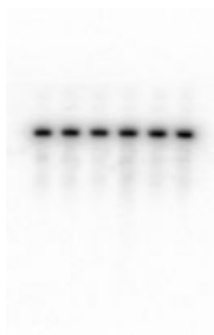

anti-ATR IB

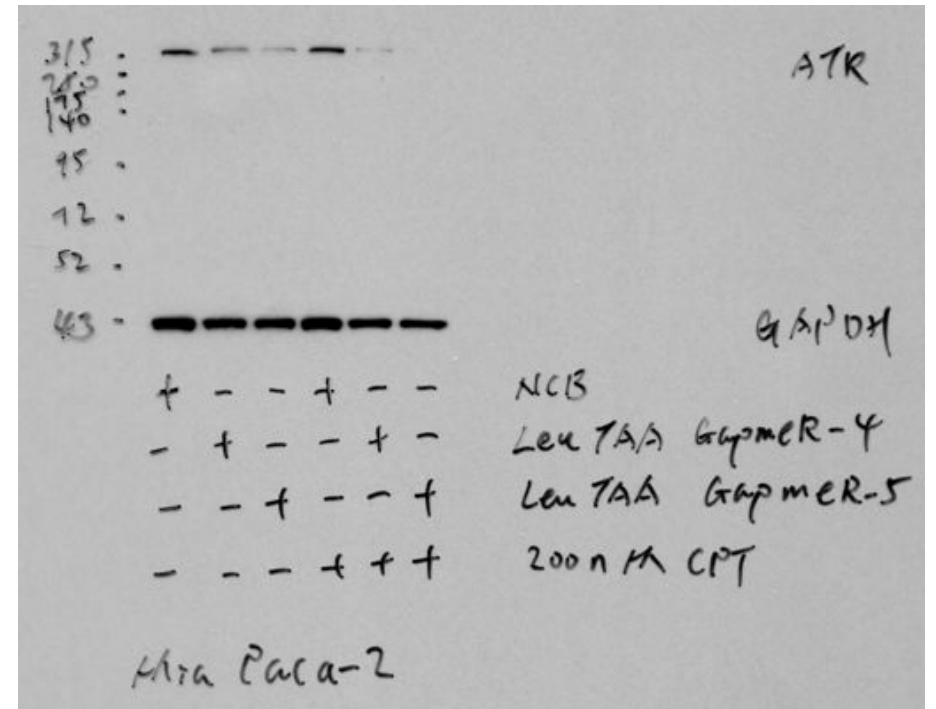

anti-GAPDH IB



|   |   |   |   |   |   |                |
|---|---|---|---|---|---|----------------|
| + | - | - | + | - | - | NCB            |
| - | + | - | - | + | - | Leu TAA GpmR-4 |
| - | - | + | - | - | + | Leu TAA GpmR-5 |
| - | - | - | + | + | + | 200 nM CPT     |

Mia Paca-2
